# Supplementary material for: Factors associated with pre-treatment hyperferritinemia in patients with chronic hepatitis C virus infection
Source: Research Square preprint supplement (doi:10.21203/rs.3.rs-4445076/v1), 2024-06-13
Supplement: Supplementary file 1 [file 0de4f09f77cfebb03821a1fd.docx]

**Table 2. Univariate and multivariate regression analysis for factors associated with hyperferritinemia**

| **Parameter** | **Univariate analysis** | | | | **Multivariate analysis a** | |
| --- | --- | --- | --- | --- | --- | --- |
| **Hyperferritinemia** | | **Crude OR (95% CI) c** | **p value** | **Adjusted OR (95% CI)** | **p value** |
| **No (n = 900) b** | **Yes (n = 782) b** |
| **Age, years** |  |  |  |  |  |  |
| > 50 | 573 (63.7) | 588 (75.2) | 1.73 (1.40-2.14) | < 0.001 | 1.38 (1.09-1.74) | 0.008 |
| ≤ 50 | 327 (36.3) | 194 (24.8) | Ref |  | Ref |  |
| **Sex** |  |  |  |  |  |  |
| Male | 472 (49.1) | 392 (50.1) | 0.91 (0.75-1.10) | 0.34 | - | - |
| Female | 428 (50.9) | 390 (49.9) | Ref |  |  |  |
| **HBV coinfection** |  |  |  |  |  |  |
| Yes | 73 (8.1) | 71 (9.1) | 1.13 (0.80-1.59) | 0.48 | - | - |
| No | 827 (91.9) | 711 (90.9) | Ref |  |  |  |
| **HCV RNA** |  |  |  |  |  |  |
| > 2,000,000 IU/mL | 337 (37.4) | 301 (38.5) | 1.05 (0.86-1.27) | 0.66 | - | - |
| ≤ 2,000,000 IU/mL | 563 (62.6) | 481 (61.5) | Ref |  |  |  |
| **HCV genotype 1** |  |  |  |  |  |  |
| Yes | 514 (57.1) | 477 (61.0) | 1.17 (0.97-1.43) | 0.11 | - | - |
| No | 386 (42.9) | 305 (39.0) | Ref |  |  |  |
| **Fibrosis stage a** |  |  |  |  |  |  |
| ≥ F3 | 212 (24.2) | 320 (41.5) | 2.22 (1.80-2.74) | < 0.001 | 1.36 (1.04-1.77) | 0.02 |
| < F3 | 664 (75.8) | 451 (58.5) | Ref |  | Ref |  |
| **FIB-4** |  |  |  |  |  |  |
| > 3.25 | 199 (22.1) | 316 40.4) | 2.39 (1.93-2.95) | < 0.001 | 1.46 (1.11-1.92) | 0.01 |
| ≤ 3.25 | 701 (77.9) | 466 (59.6) | Ref |  | Ref |  |
| **MASLD a** |  |  |  |  |  |  |
| Present | 298 (34.0) | 337 (43.7) | 1.51 (1.23-1.84) | < 0.001 | 1.43 (1.12-1.76) | 0.001 |
| Absent | 578 (66.0) | 434 (56.3) | Ref |  | Ref |  |
| **ALT, ULN** |  |  |  |  |  |  |
| > 2 folds | 606 (67.3) | 688 (88.0) | 3.55 (2.75-4.59) | < 0.001 | 2.87 (2.20-3.75) | < 0.001 |
| ≤ 2 folds | 294 (32.7) | 94 (12.0) | Ref |  | Ref |  |
| **eGFR, mL/min/1.73m2** |  |  |  |  |  |  |
| < 60 | 82 (19.1) | 95 (12.1) | 1.38 (1.01-1.89) | 0.04 | - | - |
| ≥ 60 | 818 (90.9) | 687 (87.9) | Ref |  |  |  |

OR, odds ration; CI, confidence interval; HBV, hepatitis B virus; HCV, hepatitis C virus; RNA, ribonucleic acid; IU, international unit; FIB-4, fibrosis index based on four parameters; MASLD, metabolic dysfunction-associated steatotic liver disease; ALT, alanine transaminase; ULN, upper limit of normal; eGFR; estimated glomerular filtration rate.

a Thirty-five participants without valid or reliable LSM or CAP were excluded from the univariate and multivariate analyses

b Values in the corresponding columns are shown as numbers (percentages) unless otherwise indicated.

c Factors with a p value of < 0.10 in univariate analysis entered multivariate analysis.
