# Supplementary material for: Factors associated with pre-treatment hyperferritinemia in patients with chronic hepatitis C virus infection
Source: Research Square preprint supplement (doi:10.21203/rs.3.rs-4445076/v1), 2024-06-13
Supplement: Supplementary file 2 [file 11fa6f5772b64f4e22260b26.docx]

**Table 1. Baseline characteristics**

| **Characteristics a** | **Participants (N = 1682)** |
| --- | --- |
| **Age, year** | 56 (48-63) |
| **Age > 50 years, n (%)** | 1161 (69.0) |
| **Male, n (%)** | 864 (51.4) |
| **HBV coinfection, n (%)** | 144 (8.6) |
| **HCV RNA, log10, IU/mL** | 6.07 (5.37-6.56) |
| **HCV RNA > 2,000,000 IU/mL, n (%)** | 638 (37.9) |
| **HCV genotype 1, (%) b** | 991 (58.9) |
| **HBV DNA, log10 IU/mL c** | 0.00 (0.00-2.73) |
| **LSM, kPa d** | 7.5 (6.1-11.1) |
| **Fibrosis stage (METAVIR), n (%) e** |  |
| F0-F1 | 699 (42.4) |
| F2 | 416 (25.3) |
| F3 | 199 (12.1) |
| F4 | 333 (20.2) |
| **FIB-4** | 2.23 (1.42-3.73) |
| **FIB-4 > 3.25, n (%)** | 515 (30.6) |
| **CAP, dB/m d** | 238 (214-268) |
| **MASLD, n (%)** | 635 (38.6) |
| T2D | 221 (13.4) |
| BMI ≥ 23 kg/m2 | 407 (24.7) |
| **BMI, kg/m2** | 25.3 (23.0-27.6) |
| **BMI ≥ 23 kg/m2, n (%)** | 1263 (76.9) |
| **Platelet count, 109/L** | 174 (134-213) |
| **INR** | 1.00 (0.96-1.04) |
| **Albumin, g/dL** | 4.3 (4.1-4.5) |
| **Total bilirubin, mg/dL** | 0.9 (0.7-1.1) |
| **AST, U/L** | 63 (40-103) |
| **ALT, U/L** | 86 (51-146) |
| **ALT > 2 folds ULN, n (%) f** | 1294 (76.9) |
| **eGFR, mL/min/1.73m2 g** | 79 (68-94) |
| **eGFR ≥ 60 mL/min/1.73m2 g** | 1505 (89.5) |
| **Ferritin, ng/mL** | 231 (131-400) |
| **Hyperferritinemia, n (%) h** | 782 (46.5) |

HBV, hepatitis B virus; HCV, hepatitis C virus; RNA, ribonucleic acid; IU, international unit; DNA, deoxyribonucleic acid, LSM, liver stiffness measurement; kPa, kilo Pascal; FIB-4, fibrosis index based on four parameters; CAP, controlled attenuation parameter; dB, decibel; MASLD, metabolic dysfunction-associated steatotic liver disease; T2D, type 2 diabetes; BMI, body mass index; INR, international normalized ratio; AST, aspartate transaminase; ALT, alanine transaminase; ULN, upper limit of normal; eGFR, estimated glomerular filtration rate.

a Data are shown in median (interquartile range, IQR) unless otherwise indicated.

b Participants with HCV genotype 1a, genotype 1b, genotype 1a plus 1b, or unsubtypable genotype 1 were regarded as HCV genotype 1 infection.

c Data was set as 0 for serum HBV DNA level < lower limit of quantification (LLOQ)21

d Assessed by vibration-controlled transient elastography (VETE). Thirty-five participants without valid or reliable LSM or CAP were excluded from the analysis.

e The cutoff values of LSM for a hepatic fibrosis stage of F0-1, F2, F3, and F4 are ≤ 7.0 kPa, 7.1-9.4 kPa, 9.5-12.4 kPa, and ≥ 12.5 kPa, respectively.

f The ULN of ALT are 30 U/L for males and 19 U/L for females, respectively.

g Calculated by Chronic Kidney Disease Epidemiology Collaboration (CKD-EPI) equation.

h Serum ferritin levels are > 300 ng/mL for males and > 200 ng/mL for females, respectively.
