# Supplementary material for: Factors associated with pre-treatment hyperferritinemia in patients with chronic hepatitis C virus infection
Source: Research Square preprint supplement (doi:10.21203/rs.3.rs-4445076/v1), 2024-06-13
Supplement: Supplementary file 3 [file f0a862bd22ceb11ce02f219c.docx]

**Table 3. Univariate and multivariate regression analysis for factors associated with hyperferritinemia in participants with MASLD**

| **Parameter** | **Univariate analysis** | | | | **Multivariate analysis** | |
| --- | --- | --- | --- | --- | --- | --- |
| **Hyperferritinemia** | | **Crude OR (95% CI) c** | **p value** | **Adjusted OR (95% CI)** | **p value** |
| **No (n = 298) b** | **Yes (n = 337) b** |
| **T2D** |  |  |  |  |  |  |
| Present | 96 (32.2) | 125 (37.1) | 1.24 (0.89-1.72) | 0.20 | - | - |
| Absent | 202 (67.8) | 212 (62.9) | Ref |  |  |  |
| **BMI** |  |  |  |  |  |  |
| ≥ 23 kg/m2 | 292 (98.0) | 324 (96.1) | 0.51 (0.19-1.37) | 0.18 | - | - |
| < 23 kg/m2 | 6 (2.0) | 13 (3.9) | Ref |  |  |  |
| **Age, years** |  |  |  |  |  |  |
| > 50 | 113 (37.9) | 90 (26.7) | 1.68 (1.20-2.35) | 0.003 | 1.24 (0.87-1.79) | 0.24 |
| ≤ 50 | 185 (62.1) | 247 (73.3) | Ref |  | Ref |  |
| **Sex** |  |  |  |  |  |  |
| Male | 172 (57.7) | 178 (52.8) | 0.82 (0.60-1.12) | 0.22 | - | - |
| Female | 126 (42.3) | 159 (47.2) | Ref |  |  |  |
| **HBV coinfection** |  |  |  |  |  |  |
| Yes | 27 (19.1) | 38 (11.3) | 1.28 (0.76-2.15) | 0.36 | - | - |
| No | 271 (90.9) | 299 (88.7) | Ref |  |  |  |
| **HCV RNA** |  |  |  |  |  |  |
| > 2,000,000 IU/mL | 124 (41.6) | 122 (36.2) | 0.80 (0.58-1.10) | 0.16 | - | - |
| ≤ 2,000,000 IU/mL | 174 (58.4) | 215 (63.8) | Ref |  |  |  |
| **HCV genotype 1** |  |  |  |  |  |  |
| Yes | 169 (56.7) | 202 (59.9) | 1.14 (0.83-1.57) | 0.41 | - | - |
| No | 129 (43.3) | 135 (40.1) | Ref |  |  |  |
| **Fibrosis stage** |  |  |  |  |  |  |
| ≥ F3 | 96 (32.2) | 160 (47.5) | 1.90 (1.38-2.63) | < 0.001 | 1.20 (0.81-1.79) | 0.37 |
| < F3 | 202 (67.8) | 177 (52.5) | Ref |  | Ref |  |
| **FIB-4** |  |  |  |  |  |  |
| > 3.25 | 70 (23.5) | 139 (41.2) | 2.29 (1.62-3.23) | < 0.001 | 1.62 (1.05-2.50) | 0.03 |
| ≤ 3.25 | 228 (76.5) | 198 (58.8) | Ref |  | Ref |  |
| **ALT, ULN** |  |  |  |  |  |  |
| > 2 folds | 208 (69.8) | 296 (87.8) | 3.12 (2.07-4.71) | < 0.001 | 2.55 (1.67-3.90) | < 0.001 |
| ≤ 2 folds | 90 (30.2) | 41 (12.2) | Ref |  | Ref |  |
| **eGFR, mL/min/1.73m2** |  |  |  |  |  |  |
| < 60 | 39 (13.1) | 45 (13.4) | 1.02 (0.65-1.62) | 0.92 | - | - |
| ≥ 60 | 259 (86.9) | 292 (86.6) | Ref |  |  |  |

OR, odds ration; CI, confidence interval; MASLD, metabolic dysfunction-associated steatotic liver disease; T2D, type 2 diabetes; BMI, body mass index; HBV, hepatitis B virus; HCV, hepatitis C virus; RNA, ribonucleic acid; IU, international unit; FIB-4, fibrosis index based on four parameters; ALT, alanine transaminase; ULN, upper limit of normal; eGFR; estimated glomerular filtration rate.

a Values in the corresponding columns are shown as numbers (percentages) unless otherwise indicated.

b Factors with a p value of < 0.10 in univariate analysis entered multivariate analysis.
